# Supplementary material for: How to Continue? New Approaches to Investigating the Effects of Adaptive Math Learning Programs on Students’ Performance, Self-Concept, and Anxiety
Source: MDPI journal article supplement (doi:10.3390/jintelligence11060108), 2023-06-01
Supplement: s1 [file s1]

## Supplementary Materials

**Table S1.** Effects of providing Math Garden on performance with items > .30 item-scale correlation

|                                                  | Addition performance |     |          | Subtraction performance |     |          |
|--------------------------------------------------|----------------------|-----|----------|-------------------------|-----|----------|
|                                                  | $\beta$              | SE  | <i>p</i> | $\beta$                 | SE  | <i>p</i> |
| <i>Predictors</i>                                |                      |     |          |                         |     |          |
| Outcome at T <sub>1</sub>                        | <b>.55</b>           | .10 | .000     | <b>.67</b>              | .06 | .000     |
| Math Learning Program <sup>a</sup>               | −.00                 | .07 | .973     | −.01                    | .07 | .941     |
| <i>Covariates</i>                                |                      |     |          |                         |     |          |
| Gender <sup>b</sup>                              | −.08                 | .05 | .162     | −.09                    | .05 | .117     |
| Migration background T <sub>1</sub> <sup>c</sup> | .02                  | .05 | .709     | .04                     | .05 | .425     |
| Tablet typing speed T <sub>1</sub>               | .05                  | .09 | .631     | −.02                    | .06 | .769     |
| <i>R</i> <sup>2</sup>                            |                      | .33 |          |                         | .46 |          |

*Note.* Significant coefficients are printed in bold ( $p \leq .05$ ). Continuous predictors were standardized ( $M = 0$ ;  $SD = 1$ ).  $n = 370$ . Reference categories: <sup>a</sup> wait-list control condition. <sup>b</sup> male. <sup>c</sup> no other languages spoken at home besides German.

**Table S2.** Effects of providing Math Garden on performance with all performance items

|                                                  | Addition performance |     |          | Subtraction performance |     |          |
|--------------------------------------------------|----------------------|-----|----------|-------------------------|-----|----------|
|                                                  | $\beta$              | SE  | <i>p</i> | $\beta$                 | SE  | <i>p</i> |
| <i>Predictors</i>                                |                      |     |          |                         |     |          |
| Outcome at T <sub>1</sub>                        | <b>.55</b>           | .10 | .000     | <b>.65</b>              | .06 | .000     |
| Math Learning Program <sup>a</sup>               | .03                  | .07 | .686     | −.01                    | .07 | .918     |
| <i>Covariates</i>                                |                      |     |          |                         |     |          |
| Gender <sup>b</sup>                              | −.07                 | .05 | .148     | −.08                    | .06 | .134     |
| Migration background T <sub>1</sub> <sup>c</sup> | −.05                 | .05 | .296     | .05                     | .05 | .249     |
| Tablet typing speed T <sub>1</sub>               | .02                  | .08 | .788     | .01                     | .06 | .912     |
| <i>R</i> <sup>2</sup>                            |                      | .32 |          |                         | .45 |          |

*Note.* Significant coefficients are printed in bold ( $p \leq .05$ ). Continuous predictors were standardized ( $M = 0$ ;  $SD = 1$ ).  $n = 370$ . Reference categories: <sup>a</sup> wait-list control condition. <sup>b</sup> male. <sup>c</sup> no other languages spoken at home besides German.

**Table S3.** Effects of practice behavior on performance with items > .30 item-scale correlation

|                                                  | Addition<br>performance |           |          | Subtraction<br>Performance |           |          |
|--------------------------------------------------|-------------------------|-----------|----------|----------------------------|-----------|----------|
|                                                  | $\beta$                 | <i>SE</i> | <i>p</i> | $\beta$                    | <i>SE</i> | <i>p</i> |
| PRACTICED TASKS                                  |                         |           |          |                            |           |          |
| <i>Predictors</i>                                |                         |           |          |                            |           |          |
| Outcome at T <sub>1</sub>                        | <b>.49</b>              | .14       | .000     | <b>.70</b>                 | .06       | .000     |
| Practiced tasks                                  | .07                     | .07       | .316     | <b>.12</b>                 | .05       | .015     |
| <i>Covariates</i>                                |                         |           |          |                            |           |          |
| Gender <sup>a</sup>                              | −.11                    | .06       | .056     | −.14                       | .10       | .095     |
| Migration background T <sub>1</sub> <sup>b</sup> | −.00                    | .05       | .976     | −.04                       | .06       | .515     |
| Tablet typing speed T <sub>1</sub>               | .16                     | .12       | .185     | −.01                       | .08       | .885     |
| <i>R</i> <sup>2</sup>                            | .34                     |           |          | .53                        |           |          |
| PRACTICED WEEKS                                  |                         |           |          |                            |           |          |
| <i>Predictors</i>                                |                         |           |          |                            |           |          |
| Outcome at T <sub>1</sub>                        | <b>.49</b>              | .14       | .000     | <b>.68</b>                 | .07       | .000     |
| Practiced weeks                                  | <b>.13<sup>+</sup></b>  | .05       | .015     | .06                        | .06       | .282     |
| <i>Covariates</i>                                |                         |           |          |                            |           |          |
| Gender <sup>a</sup>                              | −.13 <sup>+</sup>       | .05       | .014     | −.15 <sup>+</sup>          | .07       | .045     |
| Migration background T <sub>1</sub> <sup>b</sup> | −.00                    | .05       | .953     | −.04                       | .06       | .589     |
| Tablet typing speed T <sub>1</sub>               | .18                     | .12       | .154     | −.01                       | .09       | .928     |
| <i>R</i> <sup>2</sup>                            | .36                     |           |          | .52                        |           |          |

*Note.* Significant coefficients are printed in bold ( $p \leq .05$ ). Continuous predictors were standardized ( $M = 0$ ;  $SD = 1$ ).  $n = 200$ . Reference categories: <sup>a</sup> male, <sup>b</sup> no other languages spoken at home besides German. <sup>+</sup>Coefficient differed in significance level ( $p \leq .05$ ) in contrast to original analysis with item-scale correlation > .5.

**Table S4.** Effects of practice behavior on performance with all performance items

|                                      | Addition<br>performance |           |          | Subtraction<br>Performance |           |          |
|--------------------------------------|-------------------------|-----------|----------|----------------------------|-----------|----------|
|                                      | $\beta$                 | <i>SE</i> | <i>p</i> | $\beta$                    | <i>SE</i> | <i>p</i> |
| PRACTICED TASKS                      |                         |           |          |                            |           |          |
| <i>Predictors</i>                    |                         |           |          |                            |           |          |
| Outcome at T <sub>1</sub>            | <b>.47</b>              | .14       | .001     | <b>.70</b>                 | .07       | .000     |
| Practiced tasks                      | .09                     | .08       | .237     | <b>.14</b>                 | .04       | .001     |
| <i>Covariates</i>                    |                         |           |          |                            |           |          |
| Gender <sup>a</sup>                  | <b>−.11<sup>†</sup></b> | .05       | .042     | −.13                       | .08       | .093     |
| Migration background T1 <sup>b</sup> | .03                     | .05       | .507     | −.01                       | .06       | .894     |
| Tablet typing speed T <sub>1</sub>   | .14                     | .11       | .199     | .01                        | .07       | .939     |
| <i>R</i> <sup>2</sup>                | .30                     |           |          | .54                        |           |          |
| PRACTICED WEEKS                      |                         |           |          |                            |           |          |
| <i>Predictors</i>                    |                         |           |          |                            |           |          |
| Outcome at T <sub>1</sub>            | <b>.47</b>              | .14       | .001     | <b>.68</b>                 | .07       | .000     |
| Practiced weeks                      | .11                     | .06       | .070     | .09                        | .05       | .087     |
| <i>Covariates</i>                    |                         |           |          |                            |           |          |
| Gender <sup>a</sup>                  | <b>−.12<sup>†</sup></b> | .05       | .012     | <b>−.15<sup>†</sup></b>    | .07       | .041     |
| Migration background T1 <sup>b</sup> | .03                     | .06       | .568     | −.01                       | .06       | .933     |
| Tablet typing speed T <sub>1</sub>   | .15                     | .11       | .167     | .03                        | .08       | .692     |
| <i>R</i> <sup>2</sup>                | .31                     |           |          | .52                        |           |          |

*Note.* Significant coefficients are printed in bold ( $p \leq .05$ ). Continuous predictors were standardized ( $M = 0$ ;  $SD = 1$ ).  $n = 200$ . Reference categories: <sup>a</sup> male. <sup>b</sup> no other languages spoken at home besides German. <sup>†</sup> Coefficient differed in significance level ( $p \leq .05$ ) in contrast to original analysis with item-scale correlation  $> .5$ .

**Table S5.** Comparing Study Variables With and Without Missing Values

|                                                  | Without Missing Values |           | With Missing Values |           |
|--------------------------------------------------|------------------------|-----------|---------------------|-----------|
|                                                  | <i>M</i>               | <i>SD</i> | <i>M</i>            | <i>SD</i> |
| ALL STUDENTS                                     |                        |           |                     |           |
| Math addition performance T <sub>1</sub>         | 5.76                   | 3.15      | 5.38                | 3.11      |
| Math addition performance T <sub>2</sub>         | 7.88                   | 2.76      | 8.40                | 2.84      |
| Math subtraction performance T <sub>1</sub>      | 5.24                   | 3.74      | 5.13                | 3.47      |
| Math subtraction performance T <sub>2</sub>      | 6.62                   | 3.73      | 6.90                | 3.00      |
| Math self-concept T <sub>1</sub>                 | 2.73                   | 0.86      | 2.65                | 0.76      |
| Math self-concept T <sub>2</sub>                 | 2.74                   | 0.83      | 2.36                | 0.82      |
| Math anxiety T <sub>1</sub>                      | 3.39                   | 1.24      | 3.32                | 1.12      |
| Math anxiety T <sub>2</sub>                      | 3.21                   | 1.28      | 3.02                | 1.00      |
| Gender <sup>a</sup>                              | 0.48                   | 0.50      | 0.50                | 0.50      |
| Migration background T <sub>1</sub> <sup>b</sup> | 0.52                   | 0.50      | 0.44                | 0.50      |
| Tablet typing speed T <sub>1</sub>               | 7.97                   | 2.20      | 7.75                | 2.59      |
| EXPERIMENTAL CONDITION                           |                        |           |                     |           |
| Practiced addition tasks                         | 193.36                 | 246.17    | 159.70              | 291.88    |
| Practiced subtraction tasks                      | <b>69.61</b>           | 150.24    | <b>37.19</b>        | 69.72     |
| Overall practiced tasks                          | <b>1280.06</b>         | 1467.16   | <b>870.58</b>       | 1211.08   |
| Practiced weeks addition                         | <b>3.02</b>            | 2.42      | <b>2.42</b>         | 1.66      |
| Practiced weeks subtraction                      | <b>1.97</b>            | 2.01      | <b>1.43</b>         | 1.08      |
| Overall practiced weeks                          | <b>5.58</b>            | 3.31      | <b>3.51</b>         | 2.00      |

*Note.* All students:  $n_{\text{without}} = 214$ ,  $n_{\text{with}} = 156$ . Experimental condition:  $n_{\text{without}} = 116$ ,  $n_{\text{with}} = 84$ . Bold print indicates values that were statistically significantly different at  $p \leq .05$ . Reference categories: <sup>a</sup> male. <sup>b</sup> no other languages spoken at home besides German.
